# Supplementary material for: Mechanisms of hydrogen evolution by six-coordinate cobalt complexes: a density functional study on the role of a redox-active pyridinyl-substituted diaminotriazine benzamidine ligand as a proton relay
Source: Royal Society of Chemistry journal article supplement (doi:10.1039/d3dt03960a), 2024-01-01
Supplement: d3dt03960a1.pdf [file d3dt03960a1.pdf]

## Supplementary Information

# Mechanisms of Hydrogen Evolution by Six-Coordinate Cobalt Complexes: A Density Functional Study on the Role of Redox-Active Pyridinyl-Substituted Diaminotriazine Benzamidine Ligand as a Proton Relay

Kittimeth Thammanatpong<sup>†</sup> and Panida Surawatanawong<sup>\*,†,‡</sup>

<sup>†</sup>*Department of Chemistry and Center of Excellence for Innovation in Chemistry, Faculty of Science, Mahidol University, Bangkok 10400, Thailand*

<sup>‡</sup>*Center of Sustainable Energy and Green Materials, Mahidol University, Salaya, Nakhon Pathom 73170, Thailand*

\*E-mail: [panida.sur@mahidol.ac.th](mailto:panida.sur@mahidol.ac.th)

| Table of Contents                                                                                                                                                                                                                                                                                                                                  | Page |
|----------------------------------------------------------------------------------------------------------------------------------------------------------------------------------------------------------------------------------------------------------------------------------------------------------------------------------------------------|------|
| Standard-state conversions <sup>1</sup> .....                                                                                                                                                                                                                                                                                                      | 4    |
| Table S1. Calculated reduction potentials ( $E^0$ ) of $[\text{Co}(\text{tpy})_2]^{2+}$ and $[\text{Ru}(\text{bpy})_3]^{2+}$ .....                                                                                                                                                                                                                 | 5    |
| Fig. S1 Selected geometry parameters of the $^1[\text{Co}^{\text{III}}(\text{L}^-)(\text{LH})]^{2+}$ ( $S = 0$ ) from the X-ray crystallography <sup>8</sup> and from the calculation. ....                                                                                                                                                        | 6    |
| Table S2. Calculated reduction potentials for $[\text{Ru}(\text{bpy})_3]^{2+}$ and TEOA. ....                                                                                                                                                                                                                                                      | 7    |
| Fig. S2 Optimized geometries and relative electronic energies ( $\Delta E$ in kcal/mol) for the low spin $^2[\text{Co}^{\text{II}}(\text{L}^-)(\text{LH})]^{1+}$ , minimum energy crossing point (MECP), <sup>15, 16</sup> and the high spin $^4[\text{Co}^{\text{II}}(\text{L}^-)(\text{LH})]^{1+}$ . Selected bond distances are shown in Å..... | 8    |
| Fig. S3 Spin density plots of $^4[\text{Co}^{\text{II}}(\text{tpy})_2]^{2+}$ and $^3[\text{Co}^{\text{I}}(\text{tpy})_2]^{1+}$ . The Löwdin spin ( $\rho$ ) and charge population ( $q$ ) are shown.....                                                                                                                                           | 8    |

|                                                                                                                                                                                                                                                                                                                                                                                                                                                                                                                                                                                        |    |
|----------------------------------------------------------------------------------------------------------------------------------------------------------------------------------------------------------------------------------------------------------------------------------------------------------------------------------------------------------------------------------------------------------------------------------------------------------------------------------------------------------------------------------------------------------------------------------------|----|
| <b>Table S3.</b> The solvent corrected relative free energies for intermediates upon reductions of $[\text{Co}^{\text{III}}(\text{L}^{\cdot-})(\text{LH})]^{2+}$ (LH = py-DAT-amidine).....                                                                                                                                                                                                                                                                                                                                                                                            | 9  |
| <b>Fig. S4</b> Optimized geometries of $^1[\text{Co}^{\text{III}}(\text{L}^{\cdot-})(\text{LH})]^{2+}$ (S = 0) and $^4[\text{Co}^{\text{II}}(\text{L}^{\cdot-})(\text{LH})]^{1+}$ (S = 3/2). Selected bond distances are shown in Å.....                                                                                                                                                                                                                                                                                                                                               | 10 |
| <b>Fig. S5</b> Optimized geometries of triethanolamine (TEOA) and $[\text{HTEOA}]^+$ . The solvent corrected relative free energies are with respect to the lowest energy conformer (in kcal/mol). .....                                                                                                                                                                                                                                                                                                                                                                               | 10 |
| <b>Fig. S6</b> Optimized geometries of $\text{L}^{\cdot-}$ , LH, and $\text{LH}_2^+$ .....                                                                                                                                                                                                                                                                                                                                                                                                                                                                                             | 11 |
| <b>Fig. S7</b> The reduced forms of protonated ligand LH in triplet $\text{LH}^{*2-}$ (S = 1), open-shell singlet diradical $\text{LH}^{*2-}$ (S = 0, BS(1,1)) and closed-shell singlet $\text{LH}^{2-}$ (S = 0). The solvent corrected relative free energies are with respect to the lowest energy conformer (in kcal/mol).....                                                                                                                                                                                                                                                      | 11 |
| <b>Fig. S8</b> The reduced forms of protonated ligand $\text{LH}_2$ in closed-shell singlet $\text{LH}_2^{1-}$ (S = 0) and triplet $\text{LH}_2^{*1-}$ (S = 1). The open-shell singlet diradical $\text{LH}_2^{*1-}$ (S = 0, BS(1,1)) was not found. The solvent corrected relative free energies are with respect to the lowest energy conformer (in kcal/mol). .....                                                                                                                                                                                                                 | 11 |
| <b>Scheme S1.</b> (a) The calculated proton-transfer free energy from $[\text{HTEOA}]^+$ to pyridine in DMF solvent is shown on the horizontal arrow. (b) The calculated reduction potentials ( $E^0$ ) and proton-transfer free energy of py-DAT-amidinate $\text{L}^{\cdot-}$ in DMF solvent. The calculated reduction potentials $E^0$ vs. SCE (4.684 V) are shown on the vertical arrow. The calculated proton-transfer free energy from $[\text{HTEOA}]^+$ to the amidinate moiety of $\text{L}^{\cdot-}$ and to the pyridine moiety of LH are shown on the horizontal arrow..... | 12 |
| <b>Scheme S2.</b> Possible protonation states of $^4[\text{Co}^{\text{II}}(\text{LH})(\text{LH})]^{2+}$ . The free energies relative to the most stable protonation state are given in kcal/mol. ....                                                                                                                                                                                                                                                                                                                                                                                  | 13 |
| <b>Table S4.</b> The solvent corrected relative free energies for intermediates upon proton reductions of $^1[\text{Co}^{\text{III}}(\text{L}^{\cdot-})(\text{LH})]^{2+}$ (LH = py-DAT-amidine).....                                                                                                                                                                                                                                                                                                                                                                                   | 14 |
| <b>Table S5.</b> The calculated relative free energies ( $\Delta G$ ), reduction potentials ( $E^0$ ) <sup>a</sup> , and proton-transfer free energy ( $\Delta G^{\text{PT}}$ ) <sup>b</sup> for the Co intermediates in the most likely pathway for $\text{H}_2$ evolution (black paths in Scheme 6). .....                                                                                                                                                                                                                                                                           | 15 |
| <b>Table S6.</b> The calculated relative free energies ( $\Delta G$ ), reduction potentials ( $E^0$ ) <sup>a</sup> , and proton-transfer free energy ( $\Delta G^{\text{PT}}$ ) <sup>b</sup> for other Co intermediates in the unlikely pathway for $\text{H}_2$ evolution. ....                                                                                                                                                                                                                                                                                                       | 16 |
| <b>Fig. S9</b> Frontier molecular orbitals (MOs) and MO energies (in eV) of tpy (tpy = terpyridine), LH and $\text{LH}_2^+$ (LH = py-DAT-amidine).....                                                                                                                                                                                                                                                                                                                                                                                                                                 | 17 |
| <b>Table S7.</b> Calculated electronic excitation energies (eV) of tpy (tpy = terpyridine), LH and $\text{LH}_2^+$ (LH = py-DAT-amidine) from TD-DFT calculation. ....                                                                                                                                                                                                                                                                                                                                                                                                                 | 18 |

|                                                                                                                                                                                                                                                                                                                                                                                                                                                                                                  |    |
|--------------------------------------------------------------------------------------------------------------------------------------------------------------------------------------------------------------------------------------------------------------------------------------------------------------------------------------------------------------------------------------------------------------------------------------------------------------------------------------------------|----|
| <b>Scheme S3.</b> Possible protonation states of $^4[\text{Co}^{\text{II}}(\text{LH}^{\cdot-})(\text{LH}_2^{\cdot})]^{1+}$ . The relative free energies are given in kcal/mol. ....                                                                                                                                                                                                                                                                                                              | 19 |
| <b>Fig. S10</b> The optimized geometries of $^4[\text{Co}^{\text{II}}(\text{LH}^{\cdot-})(\text{LH}_2^{\cdot})]^{1+}$ and $^4[\text{Co}^{\text{II}}\text{H}(\text{LH})(\text{LH})]^{1+}$ . The relative free energies are shown in kcal/mol. The key bond distances are shown in Å. ....                                                                                                                                                                                                         | 20 |
| <b>Fig. S11</b> The optimized geometries of $^3[\text{Co}^{\text{II}}(\text{LH})(\text{LH}^{\cdot-})]^{1+}$ and $^3[\text{Co}^{\text{III}}\text{H}(\text{L}^{\cdot})(\text{LH})]^{1+}$ . The relative free energies are shown in kcal/mol. The key bond distances are shown in Å. ....                                                                                                                                                                                                           | 20 |
| <b>Fig. S12</b> (a) Frontier MOs and spin density plot of the $^4[\text{Co}^{\text{II}}(\text{LH}^{\cdot-})(\text{LH}_2^{\cdot})]^{1+}$ ( $S = 3/2$ , BS(4,1)). (b) Frontier MOs and spin density plot of the $^6[\text{Co}^{\text{II}}(\text{LH}^{\cdot-})(\text{LH}_2^{\cdot})]^{1+}$ ( $S = 5/2$ ). The doubly occupied orbitals were represented by quasi-restricted orbitals and the singly occupied orbitals were represented by corresponding orbitals (isodensity = 0.05). ....          | 21 |
| <b>Fig. S13</b> (a) Frontier MOs and spin density plot of the $^3[\text{Co}^{\text{II}}\text{H}(\text{LH})(\text{LH}_2^{\cdot})]^{1+}$ ( $S = 1$ , BS(3,1)). (b) Frontier MOs and spin density plot of the $^5[\text{Co}^{\text{II}}\text{H}(\text{LH})(\text{LH}_2^{\cdot})]^{1+}$ ( $S = 2$ ). The doubly occupied and unoccupied orbitals were represented by quasi-restricted orbitals and the singly occupied orbitals were represented by corresponding orbitals (isodensity = 0.05). .... | 22 |
| <b>Fig. S14</b> (a) The relative free energy (in kcal/mol) for the $\text{H}_2$ elimination from the $\text{Co}^{\text{II}}\text{-H}\cdots\text{HN}(\text{TEOA})$ vs. $\text{Co}^{\text{II}}\text{-H}\cdots\text{HN}(\text{pyridine})$ intermediates. (b) Optimized geometries of $^5[\text{Co}^{\text{II}}(\text{LH}^{\cdot-})(\text{LH}_2^{\cdot})]^{0}$ , $^5[\text{Co}^{\text{II}}\text{H}(\text{LH}^{\cdot-})(\text{LH})]^{0}$ and $^5[\text{TS}_{\text{TEOA}}]^{1+}$ . ....                | 23 |
| <b>Fig. S15</b> (a) The relative free energy (in kcal/mol) for the $\text{H}_2$ elimination from the $\text{Co}^{\text{II}}\text{-H}\cdots\text{HN}(\text{TEOA})$ intermediate. (b) Optimized geometries of $^4[\text{Co}^{\text{II}}(\text{LH}^{\cdot-})(\text{LH}_2^{\cdot})]^{1+}$ , $^4[\text{Co}^{\text{II}}\text{H}(\text{LH})(\text{LH})]^{1+}$ and $^4[\text{TS}_{\text{TEOA}}]^{2+}$ . ....                                                                                             | 24 |
| <b>References</b> .....                                                                                                                                                                                                                                                                                                                                                                                                                                                                          | 25 |

### Standard-state conversions<sup>1</sup>

By default, the geometry optimization in Gaussian 16 was carried out at the standard pressure and temperature (1 atm at 298.15 K). To convert to the standard state in the solution phase (1 M at 298.15 K), the equation S1 was applied to convert the free energy from the standard state at 1 atm to the standard state at 1 M. Let A, B, and C as an example of ideal gases,

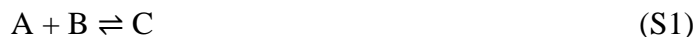

Thus, 
$$\Delta G^{\circ'} = \Delta G^{\circ} + RT \ln \frac{Q^{\circ'}}{Q^{\circ}} \quad (\text{S2})$$

where R is the gas constant, T is the temperature,  $Q$  is the reaction quotient ( $Q = \frac{[B][C]}{[A]}$ ),  $Q^{\circ}$  is the reaction quotient at 1 atm,  $Q^{\circ'}$  is the reaction quotient at 1 M,  $\Delta G^{\circ}$  is the free energy at 1 atm, and  $\Delta G^{\circ'}$  is the free energy at 1 M.

The concentration of 1 atm of ideal gas is  $\frac{1}{24.46} \text{ mol/L}$  at 298.15 K.

Thus, 
$$\Delta G^{\circ'} = \Delta G^{\circ} + RT \ln \frac{\frac{1}{24.46}}{\frac{1}{24.46 \cdot 24.46}} \quad (\text{S3})$$

$$\Delta G^{\circ'} = \Delta G^{\circ} + RT \ln(24.46) \quad (\text{S4})$$

**Table S1.** Calculated reduction potentials ( $E^0$ ) of  $[\text{Co}(\text{tpy})_2]^{2+}$  and  $[\text{Ru}(\text{bpy})_3]^{2+}$ .

| Reaction                                                                                                             | $E^0$ (V) vs Fc/Fc <sup>+</sup> in CH <sub>3</sub> CN |                            |
|----------------------------------------------------------------------------------------------------------------------|-------------------------------------------------------|----------------------------|
|                                                                                                                      | Calc <sup>a</sup>                                     | Exp <sup>c</sup>           |
| $^4[\text{Co}^{\text{II}}(\text{tpy})_2]^{2+} + e^- \rightarrow ^3[\text{Co}^{\text{I}}(\text{tpy})_2]^{1+}$         | -1.25                                                 | -1.19 (-1.17) <sup>d</sup> |
| $^3[\text{Co}^{\text{I}}(\text{tpy})_2]^{1+} + e^- \rightarrow ^4[\text{Co}^{\text{II}}(\text{tpy}^{\bullet-})_2]^0$ | -2.08                                                 | -2.07 (-2.04) <sup>d</sup> |
| $\text{tpy} + e^- \rightarrow \text{tpy}^{\bullet-}$                                                                 | -2.59                                                 | -2.52                      |

  

| Reaction                                                                                                     | $E^0$ (V) vs SCE in CH <sub>3</sub> CN |                  |
|--------------------------------------------------------------------------------------------------------------|----------------------------------------|------------------|
|                                                                                                              | Calc <sup>b</sup>                      | Exp <sup>e</sup> |
| $^1[\text{Ru}^{\text{II}}(\text{bpy})_3]^{2+} + e^- \rightarrow ^2[\text{Ru}^{\text{I}}(\text{bpy})_3]^{1+}$ | -1.38                                  | -1.32            |

<sup>a</sup>The calculated  $E^0$  vs experimental  $E^0$  of ferrocene/ferrocenium (Fc/Fc<sup>+</sup>) (4.98 V).<sup>2</sup>

<sup>b</sup>The calculated  $E^0$  vs experimental  $E^0$  (SCE) (4.684 V). This is obtained from  $E^0$  vs  $E^0$  (SHE) (4.44 V),<sup>3</sup> which is converted to  $E^0$  vs  $E^0$  (SCE) (4.684 V) by applying 0.244 V correction.<sup>4</sup>

<sup>c</sup>The experimental  $E^0$  vs Fc/Fc<sup>+</sup> in CH<sub>3</sub>CN is from Ferreira et al.<sup>5</sup> The scan rate was 0.05 V/s.

<sup>d</sup>The experimental  $E^0$  vs Fc/Fc<sup>+</sup> in CH<sub>3</sub>CN is from Aroua et al.<sup>6</sup> The scan rate was 0.05 V/s.

<sup>e</sup>The experimental  $E^0$  vs SCE in CH<sub>3</sub>CN is from Wacholtz et al.<sup>7</sup> The scan rate was 0.2 V/s.

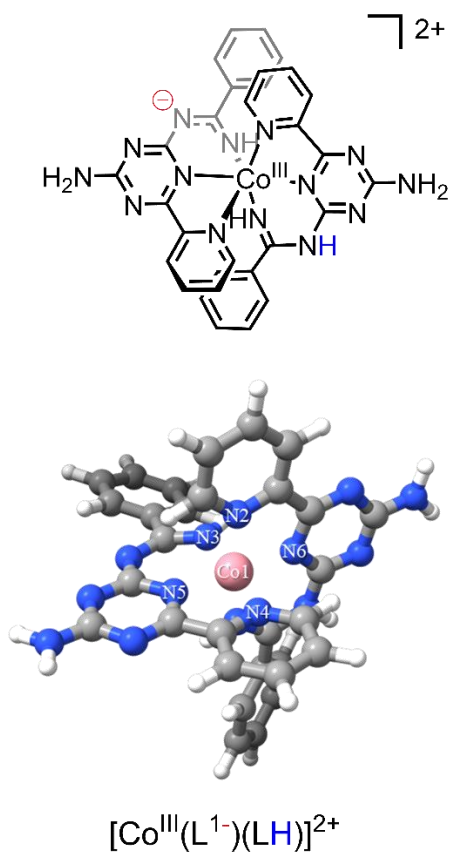

| bond distance<br>(Å) | $^1[Co^{III}(L^1)(LH)]^{2+}$ |                    |
|----------------------|------------------------------|--------------------|
|                      | X-ray <sup>8</sup>           | B3LYP <sup>a</sup> |
| Co-L <sup>-</sup>    |                              |                    |
| Co-N4(pyridine)      | 1.962                        | 2.005              |
| Co-N5(triazine)      | 1.898                        | 1.921              |
| Co-N3(amidinate)     | 1.887                        | 1.900              |
| Co-LH                |                              |                    |
| Co-N2(pyridine)      | 1.973                        | 1.998              |
| Co-N6(triazine)      | 1.902                        | 1.938              |
| Co-N1(amidine)       | 1.905                        | 1.925              |
| MUE                  |                              | 0.026              |

<sup>a</sup>Geometry optimization using B3LYP in DMF solvent with CPCM and the basis set is def2-TZVP for Co and 6-311G(d) for other atoms.

**Fig. S1** Selected geometry parameters of the  $^1[Co^{III}(L^1)(LH)]^{2+}$  ( $S = 0$ ) from the X-ray crystallography<sup>8</sup> and from the calculation.

**Table S2.** Calculated reduction potentials for  $[\text{Ru}(\text{bpy})_3]^{2+}$  and TEOA.

|                                                                                                                                                                      | $E^0$ (V) vs SCE  |                  |
|----------------------------------------------------------------------------------------------------------------------------------------------------------------------|-------------------|------------------|
|                                                                                                                                                                      | <sup>a</sup> Calc | <sup>b</sup> Exp |
| <b>Oxidative quenching</b>                                                                                                                                           |                   |                  |
| ${}^2[\text{Ru}^{\text{III}}(\text{bpy})_3]^{3+} + e^- \rightarrow {}^*{}^3[\text{Ru}^{\text{III}}(\text{bpy}^{\bullet-})(\text{bpy})_2]^{2+}$                       | -0.88             | $-0.81 \pm 0.07$ |
| <b>Reductive quenching</b>                                                                                                                                           |                   |                  |
| ${}^*{}^3[\text{Ru}^{\text{III}}(\text{bpy}^{\bullet-})(\text{bpy})_2]^{2+} + e^- \rightarrow {}^2[\text{Ru}^{\text{II}}(\text{bpy}^{\bullet-})(\text{bpy})_2]^{1+}$ | 0.62              | $0.77 \pm 0.07$  |
| $\text{TEOA}^{\bullet+} + e^- \rightarrow \text{TEOA}$                                                                                                               | 0.63              | $0.82^c$         |
| ${}^1[\text{Ru}^{\text{II}}(\text{bpy})_3]^{2+} + e^- \rightarrow {}^2[\text{Ru}^{\text{II}}(\text{bpy}^{\bullet-})(\text{bpy})_2]^{1+}$                             | -1.38             | $-1.33 \pm 0.07$ |

<sup>a</sup>The calculated  $E^0$  vs SCE in DMF using B3LYP/BS2 (this work). In BS2, def2-TZVP was used for Co and 6-311++G(d,p) for C, H, N.

<sup>b</sup>The experimental  $E^0$  vs SCE in  $\text{CH}_3\text{CN}$  is from Bock *et al.*<sup>12, 13</sup>

<sup>c</sup>The experimental  $E^0$  vs SCE in aqueous is from Grätzel *et al.*<sup>14</sup>

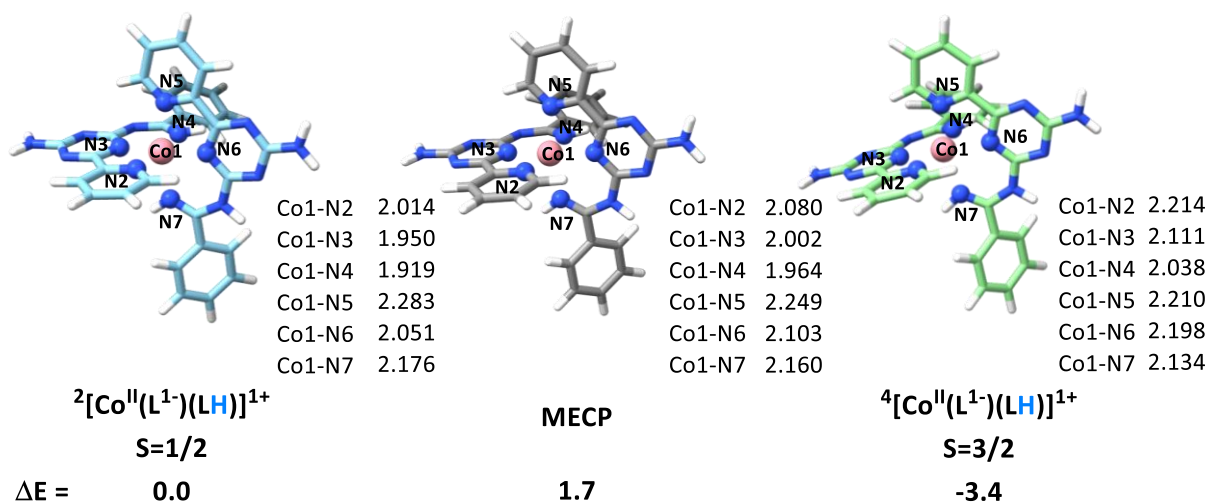

**Fig. S2** Optimized geometries and relative electronic energies ( $\Delta E$  in kcal/mol) for the low spin  $^2[\text{Co}^{\text{II}}(\text{L}^1)(\text{LH})]^{1+}$ , minimum energy crossing point (MECP),<sup>15, 16</sup> and the high spin  $^4[\text{Co}^{\text{II}}(\text{L}^1)(\text{LH})]^{1+}$ . Selected bond distances are shown in Å.

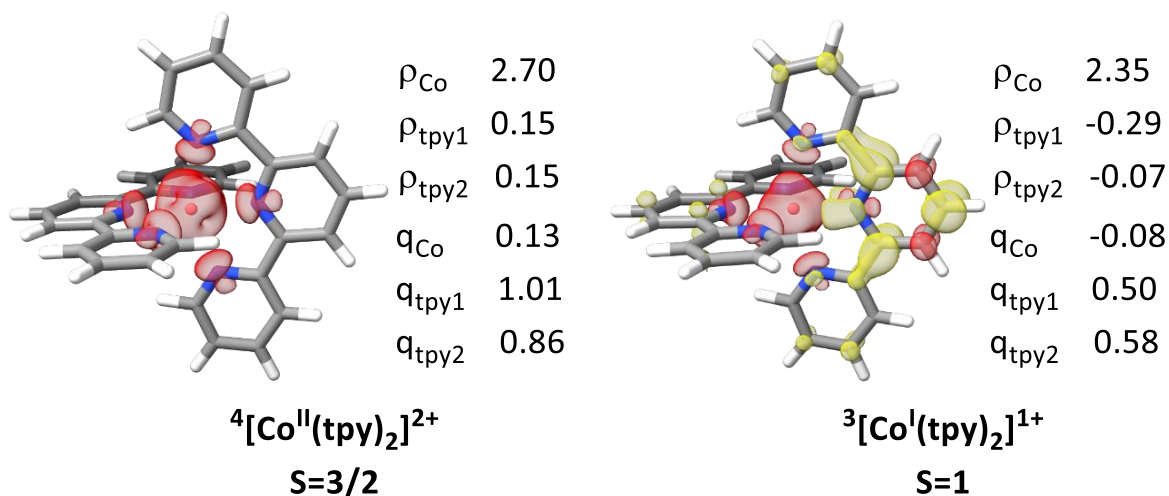

**Fig. S3** Spin density plots of  $^4[\text{Co}^{\text{II}}(\text{tpy})_2]^{2+}$  and  $^3[\text{Co}^{\text{I}}(\text{tpy})_2]^{1+}$ . The Löwdin spin ( $\rho$ ) and charge population ( $q$ ) are shown.



**Table S3.** The solvent corrected relative free energies for intermediates upon reductions of  $[\text{Co}^{\text{III}}(\text{L}^{\cdot-})(\text{LH})]^{2+}$  (LH = py-DAT-amidine).

|                                                                              | Spin state     |                | $E_{\text{elec}}$<br>(Hartree) | $\langle S^2 \rangle$ | Absolute free energy<br>(Hartree) | Relative free energy<br>(kcal/mol) |
|------------------------------------------------------------------------------|----------------|----------------|--------------------------------|-----------------------|-----------------------------------|------------------------------------|
| $[\text{Co}^{\text{III}}(\text{L}^{\cdot-})(\text{LH})]^{2+}$                | <b>S = 0</b>   |                | <b>-3308.034035</b>            | <b>0.00</b>           | <b>-3307.560915</b>               | <b>0.0</b>                         |
|                                                                              | S = 1          |                | -3307.926622                   | 2.03                  | -3307.458749                      | 64.1                               |
| $[\text{Co}^{\text{II}}(\text{L}^{\cdot-})(\text{LH})]^{1+}$                 | S = 1/2        |                | -3308.193972                   | 0.76                  | -3307.730099                      | 6.7                                |
|                                                                              | <b>S = 3/2</b> |                | <b>-3308.199443</b>            | <b>3.76</b>           | <b>-3307.740761</b>               | <b>0.0</b>                         |
| $[\text{Co}^{\text{II}}(\text{L}^{\cdot-})(\text{LH}^{\cdot-})]^{0}$         | S = 0          | closed shell   | -3308.280253                   | 0.00                  | -3307.816626                      | 27.3                               |
|                                                                              | S = 0          | BS(1,1)        | -3308.294087                   | 1.02                  | -3307.832290                      | 17.5                               |
|                                                                              | S = 1          | BS(2,0)        | -3308.294153                   | 2.02                  | -3307.848778                      | 7.1                                |
|                                                                              | <b>S = 1</b>   | <b>BS(3,1)</b> | <b>-3308.315935</b>            | <b>3.01</b>           | <b>-3307.858591</b>               | <b>0.9</b>                         |
|                                                                              | <b>S = 2</b>   |                | <b>-3308.316546</b>            | <b>6.02</b>           | <b>-3307.860094</b>               | <b>0.0</b>                         |
| $[\text{Co}^{\text{II}}(\text{L}^{\cdot2-})(\text{LH}^{\cdot-})]^{1-}$       | S = 1/2        |                | -3308.412341                   | 1.78                  | -3307.954403                      | 4.9                                |
|                                                                              | S = 3/2        | BS(3,0)        | -3308.412613                   | 3.78                  | -3307.955428                      | 4.2                                |
|                                                                              | <b>S = 3/2</b> | <b>BS(4,1)</b> | <b>-3308.415618</b>            | <b>4.76</b>           | <b>-3307.961469</b>               | <b>0.5</b>                         |
|                                                                              | <b>S = 5/2</b> |                | <b>-3308.416208</b>            | <b>8.78</b>           | <b>-3308.043661</b>               | <b>0.0</b>                         |
| $[\text{Co}^{\text{II}}(\text{L}^{\cdot2-})(\text{LH}^{\cdot\cdot2-})]^{2-}$ | S = 0          |                | -3308.487902                   | 1.02                  | -3308.033669                      | 9.7                                |
|                                                                              | S = 1          |                | -3308.488198                   | 2.02                  | -3308.034737                      | 9.1                                |
|                                                                              | S = 2          | BS(4,2)        | -3308.494776                   | 3.83                  | -3308.043751                      | 3.4                                |
|                                                                              | <b>S = 2</b>   | <b>BS(5,1)</b> | <b>-3308.496390</b>            | <b>6.89</b>           | <b>-3308.049177</b>               | <b>0.0</b>                         |
|                                                                              | S = 3          |                | -3308.493315                   | 12.04                 | -3308.043661                      | 3.5                                |

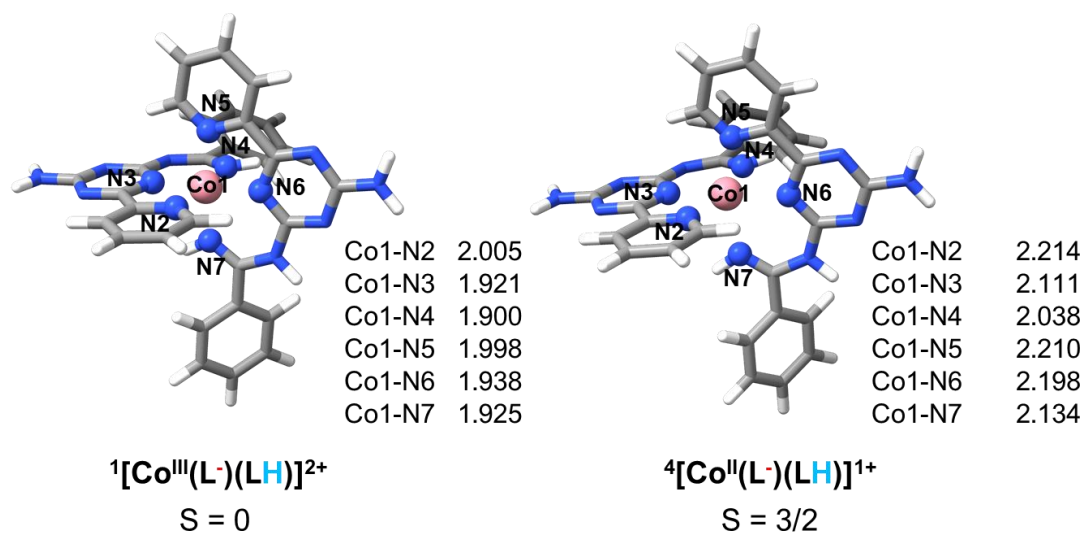

**Fig. S4** Optimized geometries of  $^1[\text{Co}^{\text{III}}(\text{L}^-)(\text{LH})]^{2+}$  (S = 0) and  $^4[\text{Co}^{\text{II}}(\text{L}^-)(\text{LH})]^{1+}$  (S = 3/2). Selected bond distances are shown in Å.

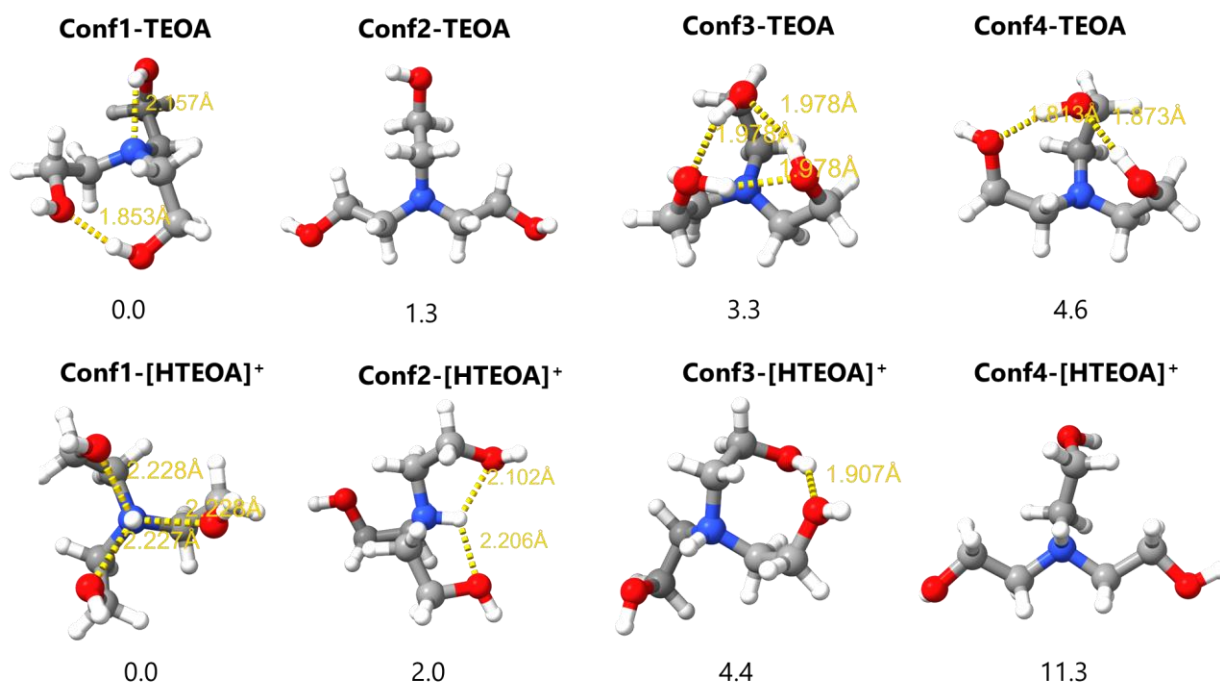

**Fig. S5** Optimized geometries of triethanolamine (TEOA) and  $[\text{HTEOA}]^+$ . The solvent corrected relative free energies are with respect to the lowest energy conformer (in kcal/mol).

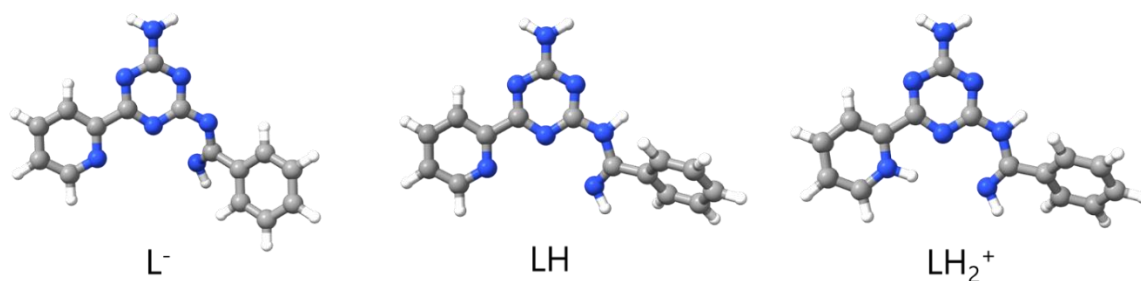

**Fig. S6** Optimized geometries of  $L^-$ ,  $LH$ , and  $LH_2^+$ .

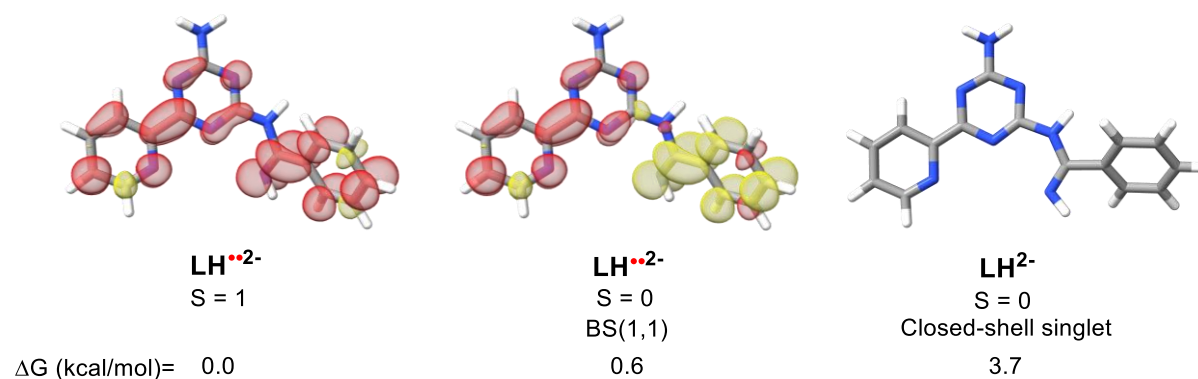

**Fig. S7** The reduced forms of protonated ligand  $LH$  in triplet  $LH^{\bullet\bullet 2-}$  ( $S = 1$ ), open-shell singlet diradical  $LH^{\bullet\bullet 2-}$  ( $S = 0$ ,  $BS(1,1)$ ) and closed-shell singlet  $LH^{2-}$  ( $S = 0$ ). The solvent corrected relative free energies are with respect to the lowest energy conformer (in kcal/mol).

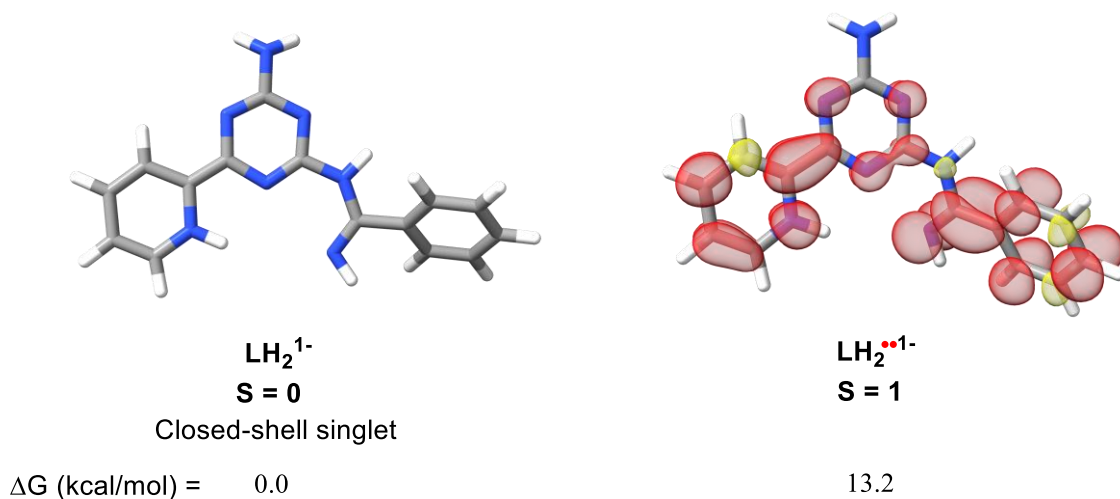

**Fig. S8** The reduced forms of protonated ligand  $LH_2$  in closed-shell singlet  $LH_2^{1-}$  ( $S = 0$ ) and triplet  $LH_2^{\bullet\bullet 1-}$  ( $S = 1$ ). The open-shell singlet diradical  $LH_2^{\bullet\bullet 1-}$  ( $S = 0$ ,  $BS(1,1)$ ) was not found. The solvent corrected relative free energies are with respect to the lowest energy conformer (in kcal/mol).

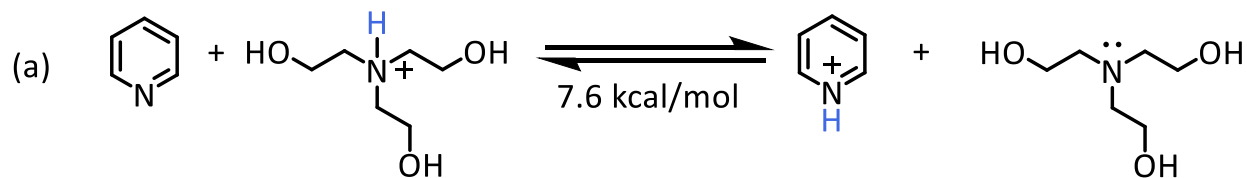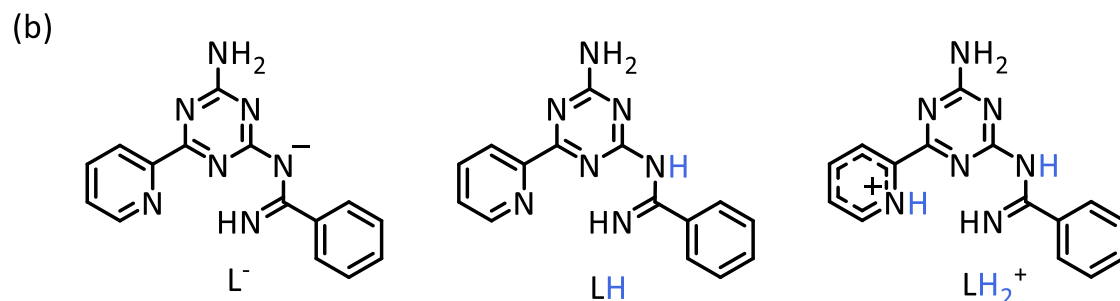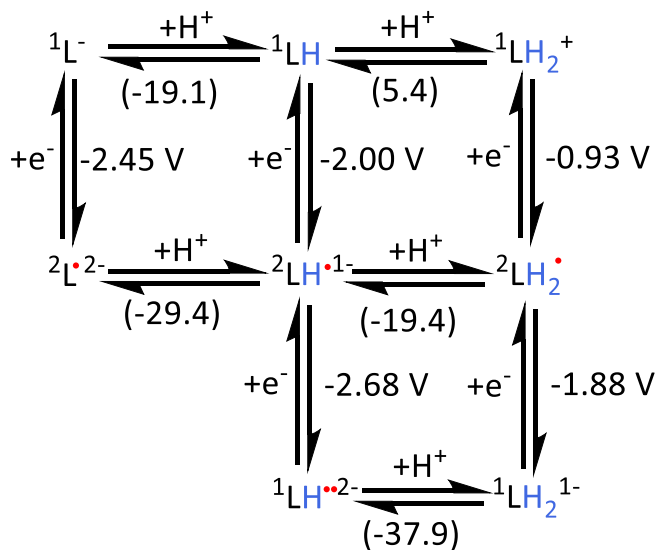

**Scheme S1.** (a) The calculated proton-transfer free energy from [HTEOA]<sup>+</sup> to pyridine in DMF solvent is shown on the horizontal arrow. (b) The calculated reduction potentials ( $E^0$ ) and proton-transfer free energy of py-DAT-amidinate  $L^-$  in DMF solvent. The calculated reduction potentials  $E^0$  vs. SCE (4.684 V) are shown on the vertical arrow. The calculated proton-transfer free energy from [HTEOA]<sup>+</sup> to the amidinate moiety of  $L^-$  and to the pyridine moiety of LH are shown on the horizontal arrow.

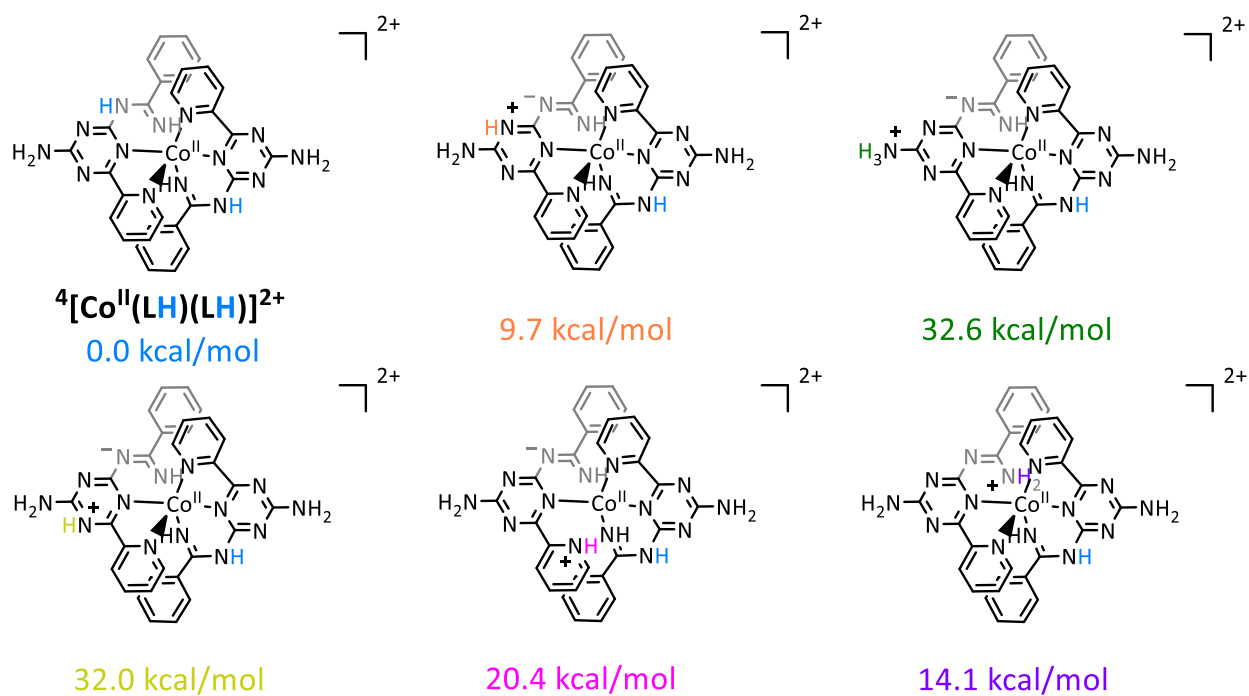

**Scheme S2.** Possible protonation states of  $4[\text{Co}^{\text{II}}(\text{LH})(\text{LH})]^{2+}$ . The free energies relative to the most stable protonation state are given in kcal/mol.

**Table S4.** The solvent corrected relative free energies for intermediates upon proton reductions of  $^1[\text{Co}^{\text{III}}(\text{L}^{\cdot-})(\text{LH})]^{2+}$  (LH = py-DAT-amidine).

|                                                                          | Spin state     | Broken Symmetry | $E_{\text{elec}}$<br>(Hartree) | $\langle S^2 \rangle$ | Absolute free energy<br>(Hartree) | Relative free energy<br>(kcal/mol) |
|--------------------------------------------------------------------------|----------------|-----------------|--------------------------------|-----------------------|-----------------------------------|------------------------------------|
| $[\text{Co}^{\text{II}}(\text{LH})(\text{LH})]^{2+}$                     | S = 1/2        |                 | -3308.099296                   | 0.76                  | -3308.174994                      | 8.7                                |
|                                                                          | <b>S = 3/2</b> |                 | <b>-3308.112934</b>            | <b>3.76</b>           | <b>-3308.188856</b>               | <b>0.0</b>                         |
| $[\text{Co}^{\text{II}}(\text{LH})(\text{LH}^{\cdot-})]^{1+}$            | S = 0          |                 | -3308.224485                   | 1.02                  | -3308.305239                      | 5.9                                |
|                                                                          | S = 1          | BS(2,0)         | -3308.225741                   | 2.02                  | -3308.306446                      | 5.2                                |
|                                                                          | <b>S = 1</b>   | <b>BS(3,1)</b>  | <b>-3308.233384</b>            | <b>2.99</b>           | <b>-3308.314164</b>               | <b>0.3</b>                         |
|                                                                          | <b>S = 2</b>   |                 | <b>-3308.233672</b>            | <b>6.02</b>           | <b>-3308.314705</b>               | <b>0.0</b>                         |
| $[\text{Co}^{\text{II}}(\text{LH}^{\cdot-})(\text{LH}^{\cdot-})]^{0}$    | S = 1/2        |                 | -3308.337360                   | 1.78                  | -3308.423593                      | 7.4                                |
|                                                                          | S = 3/2        | BS(3,0)         | -3308.338217                   | 3.78                  | -3308.424683                      | 6.7                                |
|                                                                          | <b>S = 3/2</b> | <b>BS(4,1)</b>  | <b>-3308.347807</b>            | <b>4.77</b>           | <b>-3308.434250</b>               | <b>0.7</b>                         |
|                                                                          | <b>S = 5/2</b> |                 | <b>-3308.348793</b>            | <b>8.78</b>           | <b>-3308.435394</b>               | <b>0.0</b>                         |
| $[\text{Co}^{\text{II}}(\text{LH}^{\cdot-})(\text{LH}_2^{\cdot-})]^{1+}$ | S = 1/2        |                 | -3308.780210                   | 1.72                  | -3308.865919                      | 3.7                                |
|                                                                          | S = 3/2        | BS(3,0)         | -3308.779946                   | 3.78                  | -3308.864958                      | 4.3                                |
|                                                                          | <b>S = 3/2</b> | <b>BS(4,1)</b>  | <b>-3308.786604</b>            | <b>4.45</b>           | <b>-3308.871794</b>               | <b>0.0</b>                         |
|                                                                          | S = 5/2        |                 | -3308.780595                   | 8.77                  | -3308.865886                      | 3.7                                |
| $[\text{Co}^{\text{II}}(\text{LH}^{\cdot-})(\text{LH}_2^{\cdot-})]^{0}$  | S = 0          |                 | -3308.896201                   | 1.01                  | -3308.985952                      | 5.6                                |
|                                                                          | S = 1          |                 | -3308.897148                   | 2.02                  | -3308.986911                      | 5.1                                |
|                                                                          | S = 1          | BS(3,1)         | -3308.893628                   | 3.26                  | -3308.976744                      | 11.4                               |
|                                                                          | <b>S = 2</b>   | <b>BS(4,0)</b>  | <b>-3308.905497</b>            | <b>6.02</b>           | <b>-3308.994971</b>               | <b>0.0</b>                         |
| $[\text{Co}^{\text{II}}\text{H}(\text{LH})(\text{LH}_2^{\cdot-})]^{1+}$  | S = 0          |                 | -3309.346058                   | 1.02                  | -3309.430816                      | 4.0                                |
|                                                                          | S = 1          | BS(2,0)         | -3309.346952                   | 2.02                  | -3309.431800                      | 3.4                                |
|                                                                          | <b>S = 1</b>   | <b>BS(3,1)</b>  | <b>-3309.352095</b>            | <b>3.02</b>           | <b>-3309.436764</b>               | <b>0.3</b>                         |
|                                                                          | <b>S = 2</b>   |                 | <b>-3309.352539</b>            | <b>6.02</b>           | <b>-3309.437248</b>               | <b>0.0</b>                         |
| TS                                                                       | S = 0          |                 | -3309.799434                   | 1.01                  | -3309.399689                      | 12.4                               |
|                                                                          | S = 1          |                 | -3309.887846                   | 2.01                  | -3309.401273                      | 11.4                               |
|                                                                          | <b>S = 1</b>   | <b>BS(3,1)</b>  | <b>-3309.899337</b>            | <b>2.90</b>           | <b>-3309.419385</b>               | <b>0.0</b>                         |
|                                                                          | S = 2          |                 | -3309.896370                   | 6.02                  | -3309.414522                      | 3.1                                |
| H <sub>2</sub>                                                           | S = 0          |                 | -1.176714                      | 0.00                  | -1.181206                         |                                    |

**Table S5.** The calculated relative free energies ( $\Delta G$ ), reduction potentials ( $E^0$ )<sup>a</sup>, and proton-transfer free energy ( $\Delta G^{\text{PT}}$ )<sup>b</sup> for the Co intermediates in the most likely pathway for H<sub>2</sub> evolution (black paths in Scheme 6).

| Reaction                                                                                                                                                                                           | $\Delta G$<br>(kcal/mol) | $E^0$ (V) | $\Delta G^{\text{PT}}$<br>(kcal/mol) |
|----------------------------------------------------------------------------------------------------------------------------------------------------------------------------------------------------|--------------------------|-----------|--------------------------------------|
| $[\text{Ru}(\text{bpy})_3]^{2+} + e^- \rightarrow [\text{Ru}(\text{bpy})_3]^{1+}$                                                                                                                  | -76.2                    | -1.38     | -                                    |
| ${}^1[\text{Co}^{\text{II}}(\text{L}^{\cdot-})(\text{LH})]^{2+} + e^- \rightarrow {}^2[\text{Co}^{\text{II}}(\text{L}^{\cdot-})(\text{LH})]^{1+}$                                                  | -106.2                   | -0.08     | -                                    |
| ${}^4[\text{Co}^{\text{II}}(\text{L}^{\cdot-})(\text{LH})]^{1+} + [\text{HTEOA}]^{1+} \rightarrow {}^4[\text{Co}^{\text{II}}(\text{LH})(\text{LH})]^{2+} + \text{TEOA}$                            | -                        | -         | -3.1                                 |
| ${}^4[\text{Co}^{\text{II}}(\text{LH})(\text{LH})]^{2+} + e^- \rightarrow {}^3[\text{Co}^{\text{II}}(\text{LH})(\text{LH}^{\cdot-})]^{1+}$                                                         | -78.6                    | -1.27     | -                                    |
| ${}^3[\text{Co}^{\text{II}}(\text{LH})(\text{LH}^{\cdot-})]^{1+} + e^- \rightarrow {}^4[\text{Co}^{\text{II}}(\text{LH}^{\cdot-})(\text{LH}^{\cdot-})]^0$                                          | -75.4                    | -1.42     | -                                    |
| ${}^4[\text{Co}^{\text{II}}(\text{LH}^{\cdot-})(\text{LH}^{\cdot-})]^0 + [\text{HTEOA}]^{1+} \rightarrow {}^4[\text{Co}^{\text{II}}(\text{LH}^{\cdot-})(\text{LH}_2^{\cdot})]^{1+} + \text{TEOA}$  | -                        | -         | 3.6                                  |
| ${}^3[\text{Co}^{\text{II}}(\text{LH})(\text{LH}^{\cdot-})]^{1+} + e^- + \text{H}^+ \rightarrow {}^4[\text{Co}^{\text{II}}(\text{LH}^{\cdot-})(\text{LH}_2^{\cdot})]^{1+}$                         | -79.2 <sup>c</sup>       | -1.25     | -                                    |
| ${}^4[\text{Co}^{\text{II}}(\text{LH}^{\cdot-})(\text{LH}_2^{\cdot})]^{1+} + e^- \rightarrow {}^3[\text{Co}^{\text{II}}(\text{LH}^{\cdot-})(\text{LH}_2^{\cdot-})]^0$                              | -77.3                    | -1.33     | -                                    |
| ${}^3[\text{Co}^{\text{II}}(\text{LH}^{\cdot-})(\text{LH}_2^{\cdot-})]^0 + [\text{HTEOA}]^{1+} \rightarrow {}^3[\text{Co}^{\text{II}}\text{H}(\text{LH})(\text{LH}_2^{\cdot})]^{1+} + \text{TEOA}$ | -                        | -         | 0.9                                  |
| ${}^4[\text{Co}^{\text{II}}(\text{LH}^{\cdot-})(\text{LH}_2^{\cdot})]^{1+} + e^- + \text{H}^+ \rightarrow {}^3[\text{Co}^{\text{II}}\text{H}(\text{LH})(\text{LH}_2^{\cdot})]^{1+}$                | -83.8 <sup>c</sup>       | -1.05     | -                                    |
| ${}^3[\text{Co}^{\text{II}}\text{H}(\text{LH})(\text{LH}_2^{\cdot})]^{1+} \rightarrow {}^3[\text{TS}_A]^{1+}$                                                                                      | 10.9                     | -         | -                                    |
| ${}^3[\text{Co}^{\text{II}}\text{H}(\text{LH})(\text{LH}_2^{\cdot})]^{1+} \rightarrow {}^3[\text{Co}^{\text{II}}(\text{LH})(\text{LH}^{\cdot-})]^{1+} + \text{H}_2$                                | -36.8                    | -         | -                                    |

<sup>a</sup> $E^0$  vs  $E^0(\text{SCE})$  (4.684 V).<sup>3, 4</sup>

<sup>b</sup> $\Delta G^{\text{PT}}$  is the proton-transfer free energy from  $[\text{HTEOA}]^{1+}$  to the Co intermediate.

<sup>c</sup>Proton solvation free energy in DMF is -264.46 kcal/mol<sup>17</sup> and the proton free energy in the gas phase is obtained from Sackur–Tetrode equation (-6.28 kcal/mol).<sup>18, 19</sup>

**Table S6.** The calculated relative free energies ( $\Delta G$ ), reduction potentials ( $E^0$ )<sup>a</sup>, and proton-transfer free energy ( $\Delta G^{\text{PT}}$ )<sup>b</sup> for other Co intermediates in the unlikely pathway for H<sub>2</sub> evolution.

| Reaction                                                                                                                                                                                                | $\Delta G$<br>(kcal/mol) | $E^0$ (V) | $\Delta G^{\text{PT}}$<br>(kcal/mol) |
|---------------------------------------------------------------------------------------------------------------------------------------------------------------------------------------------------------|--------------------------|-----------|--------------------------------------|
| ${}^1[\text{Co}^{\text{III}}(\text{L}^{1-})(\text{LH})]^{2+} + [\text{HTEOA}]^{1+} \rightarrow {}^1[\text{Co}^{\text{III}}(\text{LH})(\text{LH})]^{3+} + \text{TEOA}$                                   | -                        | -         | 9.5                                  |
| ${}^1[\text{Co}^{\text{III}}(\text{LH})(\text{LH})]^{3+} + e^- \rightarrow {}^4[\text{Co}^{\text{II}}(\text{LH})(\text{LH})]^{2+}$                                                                      | -125.4                   | 0.75      | -                                    |
| ${}^4[\text{Co}^{\text{II}}(\text{LH})(\text{LH})]^{2+} + [\text{HTEOA}]^{1+} \rightarrow {}^4[\text{Co}^{\text{II}}(\text{LH})(\text{LH}_2^{1+})]^{3+} + \text{TEOA}$                                  | -                        | -         | 33.8                                 |
| ${}^3[\text{Co}^{\text{II}}(\text{LH})(\text{LH}^{\bullet 1-})]^{1+} + [\text{HTEOA}]^{1+} \rightarrow {}^3[\text{Co}^{\text{II}}(\text{LH})(\text{LH}_2^{\bullet})]^{2+} + \text{TEOA}$                | -                        | -         | 14.7                                 |
| ${}^3[\text{Co}^{\text{II}}(\text{LH})(\text{LH}_2^{\bullet})]^{2+} + e^- \rightarrow {}^4[\text{Co}^{\text{II}}(\text{LH}^{\bullet 1-})(\text{LH}_2^{\bullet})]^{1+}$                                  | -86.5                    | -0.93     | -                                    |
| ${}^4[\text{Co}^{\text{II}}(\text{LH}^{\bullet 1-})(\text{LH}_2^{\bullet})]^{1+} + [\text{HTEOA}]^{1+} \rightarrow {}^4[\text{Co}^{\text{II}}\text{H}(\text{LH})(\text{LH}_2^{1+})]^{2+} + \text{TEOA}$ | -                        | -         | 9.8                                  |
| ${}^4[\text{Co}^{\text{II}}\text{H}(\text{LH})(\text{LH}_2^{1+})]^{2+} + e^- \rightarrow {}^3[\text{Co}^{\text{II}}\text{H}(\text{LH})(\text{LH}_2^{\bullet})]^{1+}$                                    | -86.2                    | -0.94     | -                                    |

<sup>a</sup> $E^0$  vs  $E^0(\text{SCE})$  (4.684 V).<sup>3,4</sup>

<sup>b</sup> $\Delta G^{\text{PT}}$  is the proton-transfer free energy from  $[\text{HTEOA}]^{1+}$  to the Co intermediate.



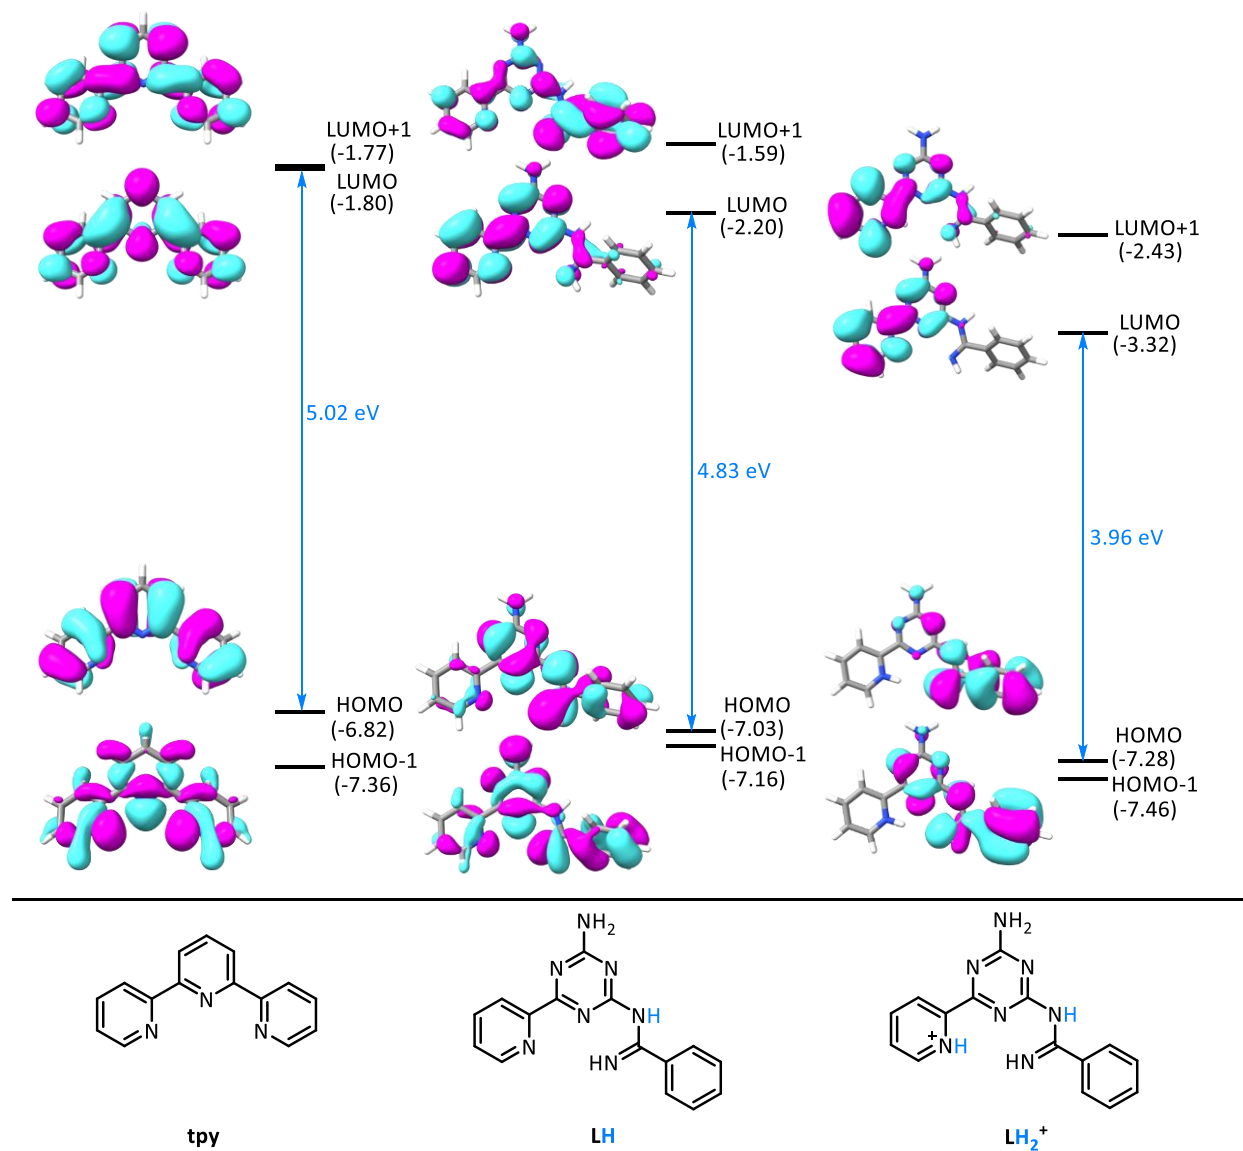

**Fig. S9** Frontier molecular orbitals (MOs) and MO energies (in eV) of tpy (tpy = terpyridine), LH and LH<sub>2</sub><sup>+</sup> (LH = py-DAT-amidine).

**Table S7.** Calculated electronic excitation energies (eV) of tpy (tpy = terpyridine), LH and LH<sub>2</sub><sup>+</sup> (LH = py-DAT-amidine) from TD-DFT calculation.

|                                   |                            | Electronic excitation<br>energy (eV) | Oscillator strength<br>( <i>f</i> ) |
|-----------------------------------|----------------------------|--------------------------------------|-------------------------------------|
| <b>tpy</b>                        | <b>HOMO → LUMO (94.1%)</b> | <b>4.35</b>                          | 0.43                                |
|                                   | HOMO → LUMO+1 (88.6%)      | 4.63                                 | 0.22                                |
| <b>LH</b>                         | HOMO → LUMO (24.4%)        | 3.90                                 | 0.01                                |
|                                   | HOMO-1 → LUMO (35.4%)      |                                      |                                     |
|                                   | HOMO-2 → LUMO (30.0%)      |                                      |                                     |
|                                   | <b>HOMO → LUMO (50.1%)</b> | <b>4.22</b>                          | 0.08                                |
|                                   | HOMO-2 → LUMO (31.6%)      |                                      |                                     |
| <b>LH<sub>2</sub><sup>+</sup></b> | <b>HOMO → LUMO (75.2%)</b> | <b>3.47</b>                          | 0.01                                |
|                                   | HOMO-1 → LUMO (16.8%)      |                                      |                                     |
|                                   | HOMO → LUMO (21.2%)        | 3.52                                 | 0.01                                |
|                                   | HOMO-1 → LUMO (48.5%)      |                                      |                                     |
|                                   | HOMO-2 → LUMO (14.3%)      |                                      |                                     |

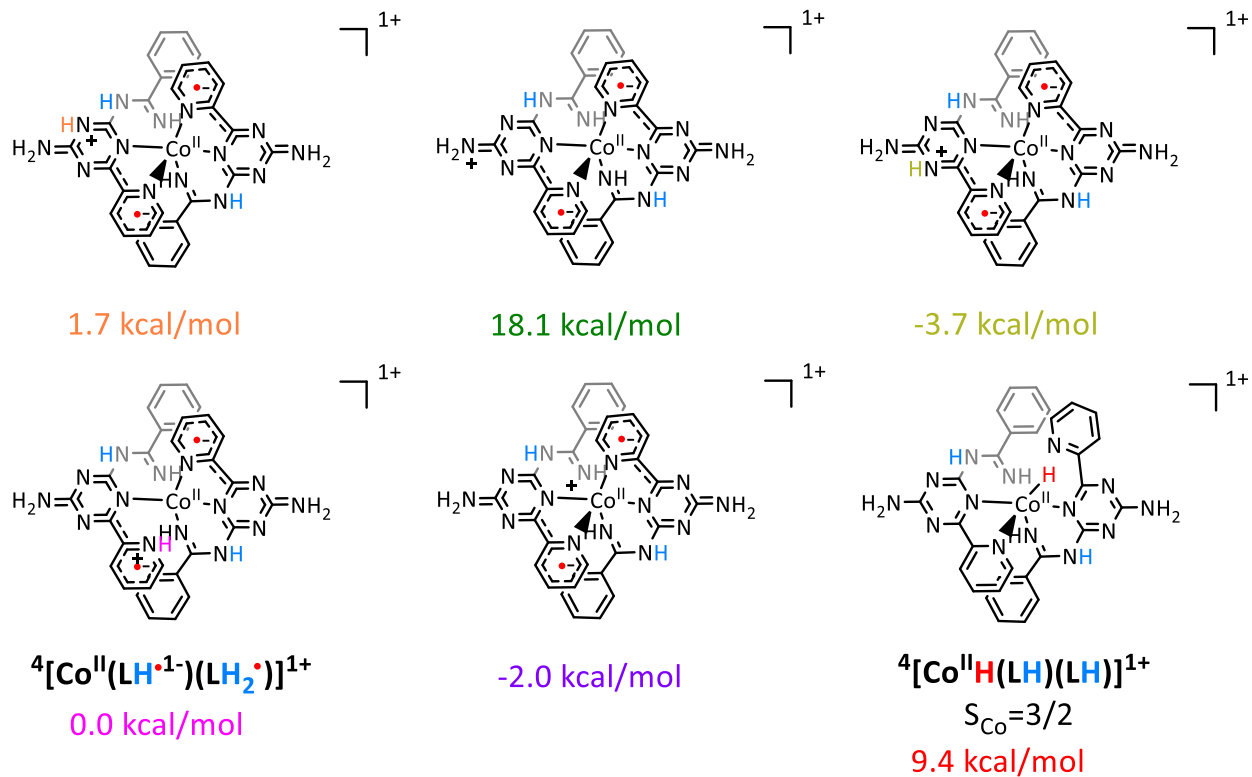

**Scheme S3.** Possible protonation states of  ${}^4[\text{Co}^{\text{II}}(\text{LH}^{\bullet-})(\text{LH}_2^{\bullet})]^{1+}$ . The relative free energies are given in kcal/mol.

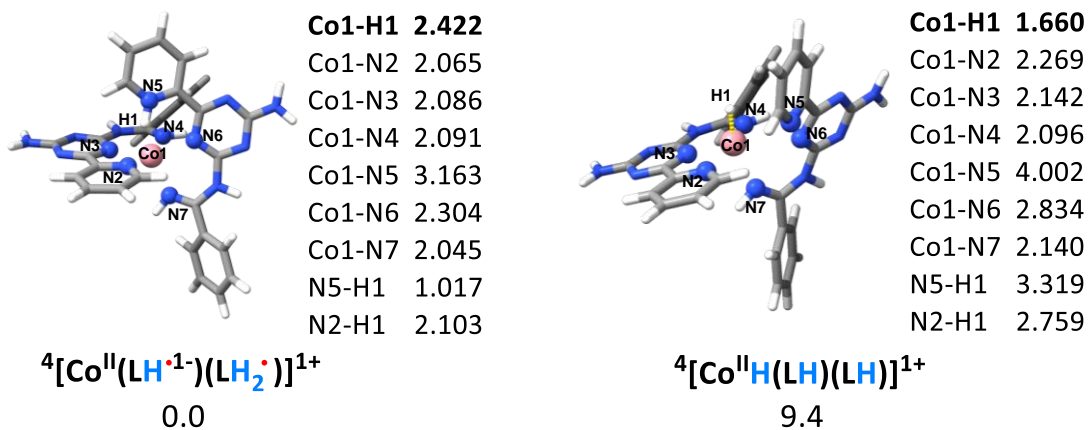

**Fig. S10** The optimized geometries of  $^4[\text{Co}^{\text{II}}(\text{LH}^{\bullet-})(\text{LH}_2^{\bullet})]^{1+}$  and  $^4[\text{Co}^{\text{II}}\text{H}(\text{LH})(\text{LH})]^{1+}$ . The relative free energies are shown in kcal/mol. The key bond distances are shown in Å.

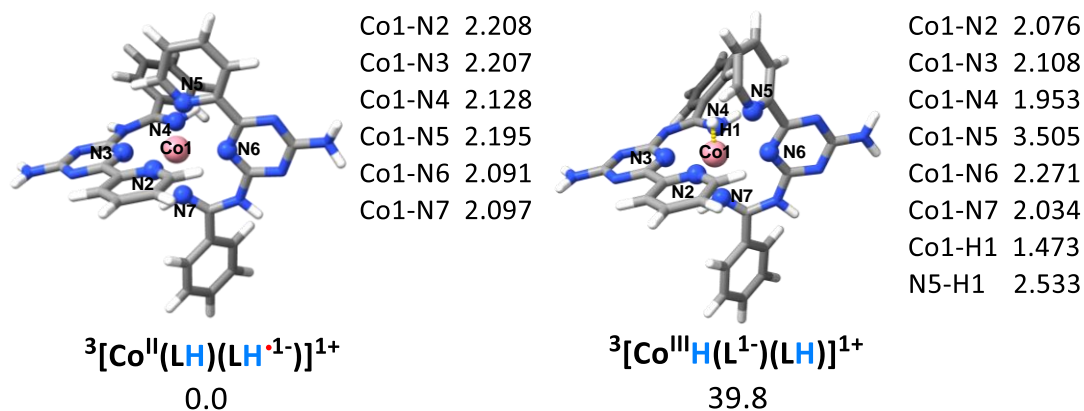

**Fig. S11** The optimized geometries of  $^3[\text{Co}^{\text{II}}(\text{LH})(\text{LH}^{\bullet-})]^{1+}$  and  $^3[\text{Co}^{\text{III}}\text{H}(\text{L}^{\bullet-})(\text{LH})]^{1+}$ . The relative free energies are shown in kcal/mol. The key bond distances are shown in Å.

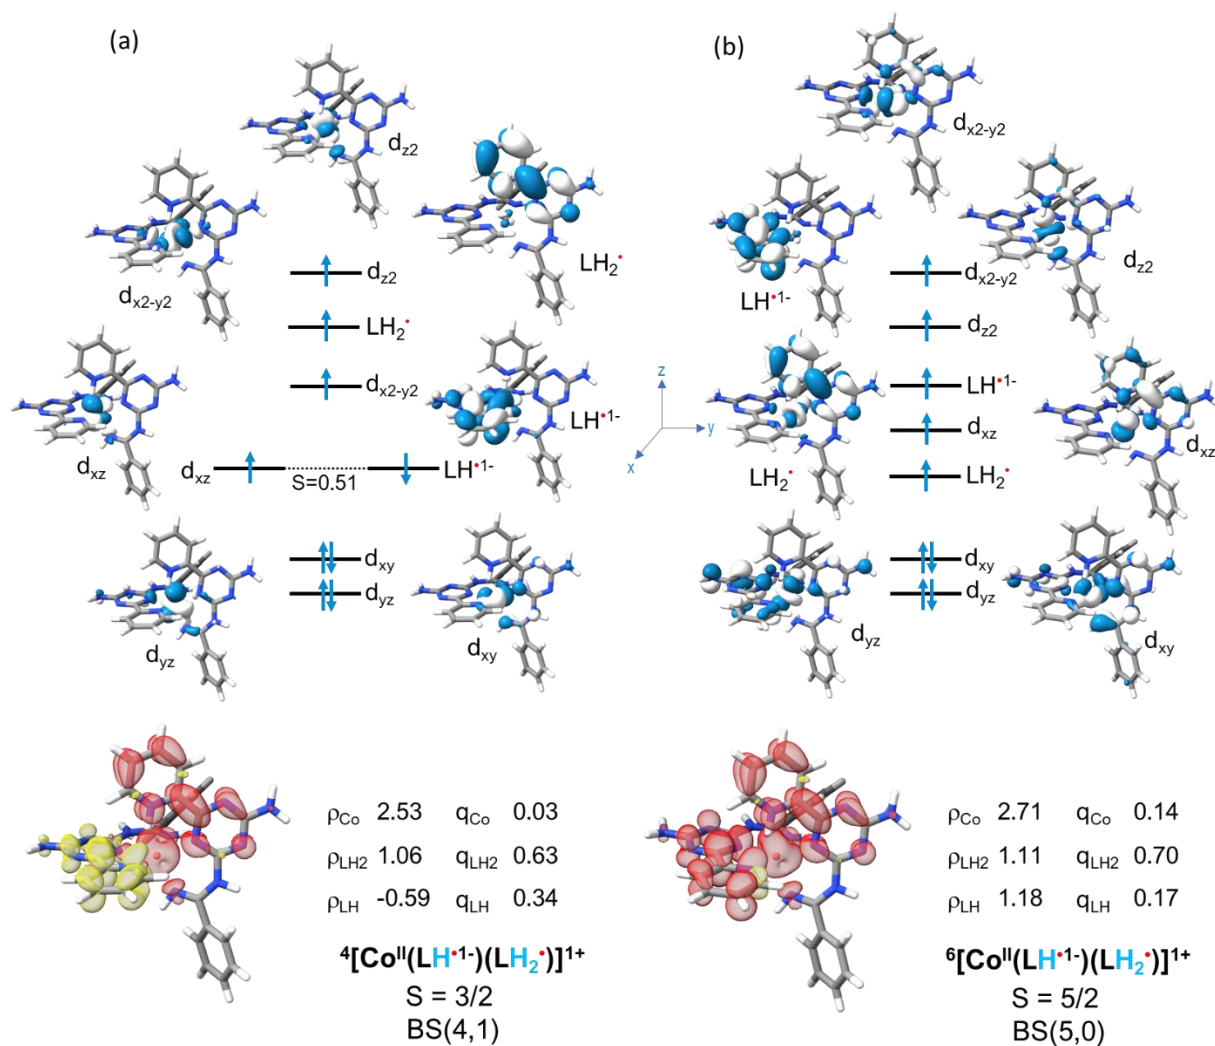

**Fig. S12** (a) Frontier MOs and spin density plot of the  ${}^4[\text{Co}^{\text{II}}(\text{LH}^{\bullet 1-})(\text{LH}_2^{\bullet})]^{1+}$  ( $S = 3/2$ , BS(4,1)). (b) Frontier MOs and spin density plot of the  ${}^6[\text{Co}^{\text{II}}(\text{LH}^{\bullet 1-})(\text{LH}_2^{\bullet})]^{1+}$  ( $S = 5/2$ ). The doubly occupied orbitals were represented by quasi-restricted orbitals and the singly occupied orbitals were represented by corresponding orbitals (isodensity = 0.05).



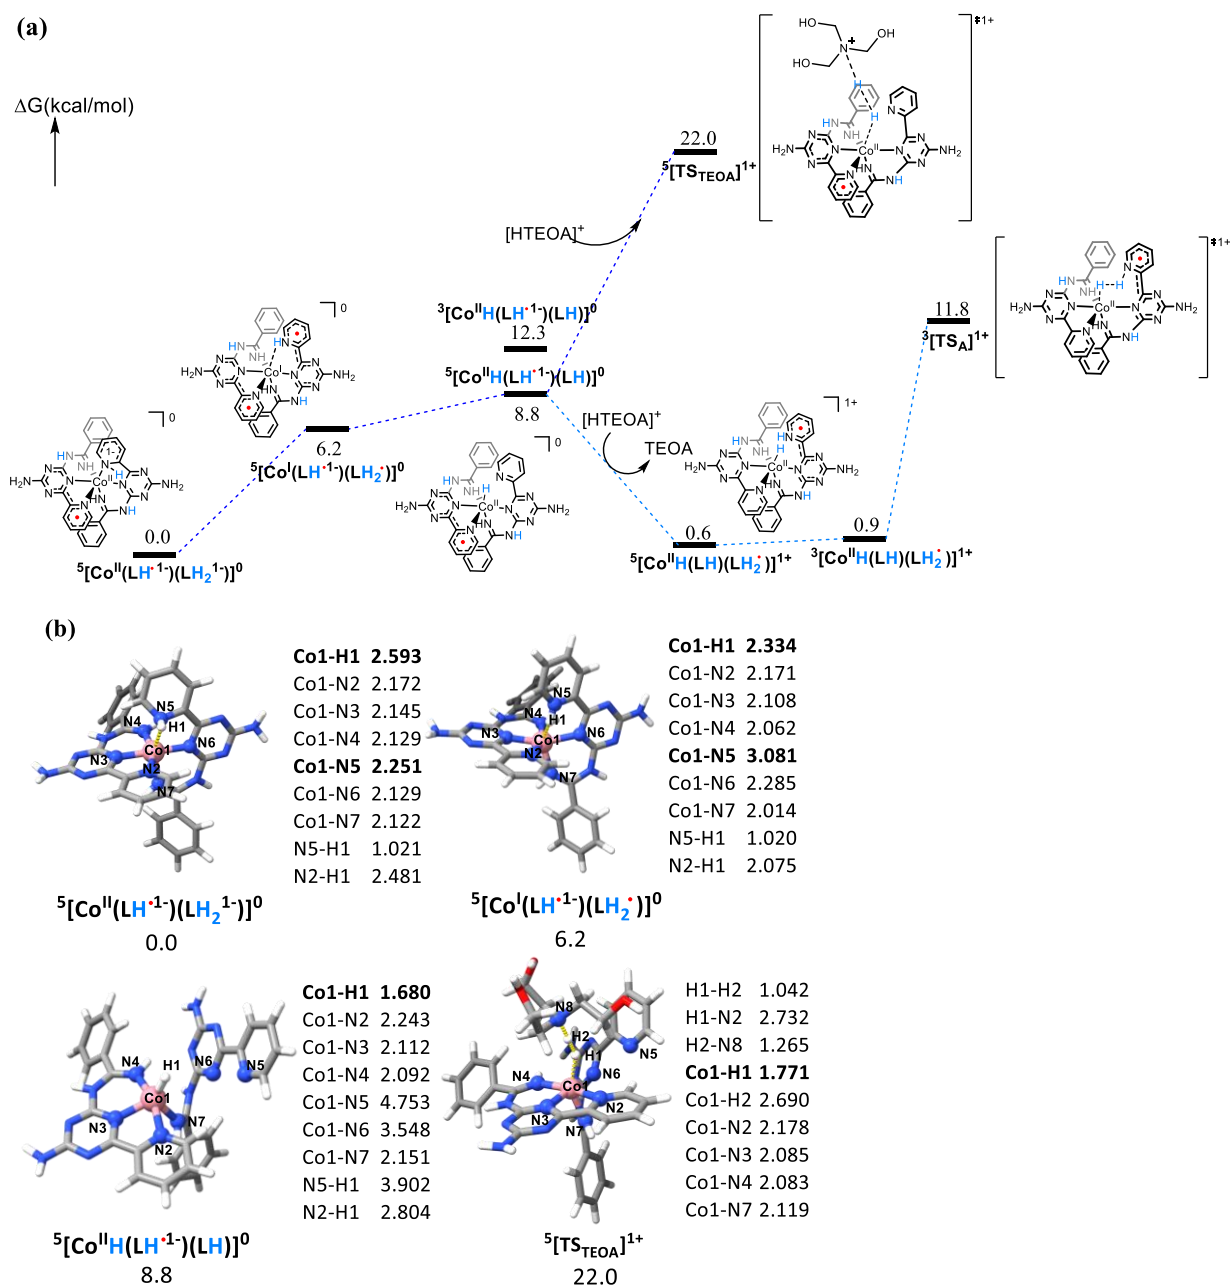

**Fig. S14** (a) The relative free energy (in kcal/mol) for the H<sub>2</sub> elimination from the Co<sup>II</sup>-H·HN(TEOA) vs. Co<sup>II</sup>-H·HN(pyridine) intermediates. (b) Optimized geometries of  $5[\text{Co}^{\text{II}}(\text{LH}^{\cdot 1-})(\text{LH}_2^{\cdot 1-})]_0$ ,  $5[\text{Co}^{\text{II}}\text{H}(\text{LH}^{\cdot 1-})(\text{LH})]_0$  and  $5[\text{TS}_{\text{TEOA}}]_1^{1+}$ .

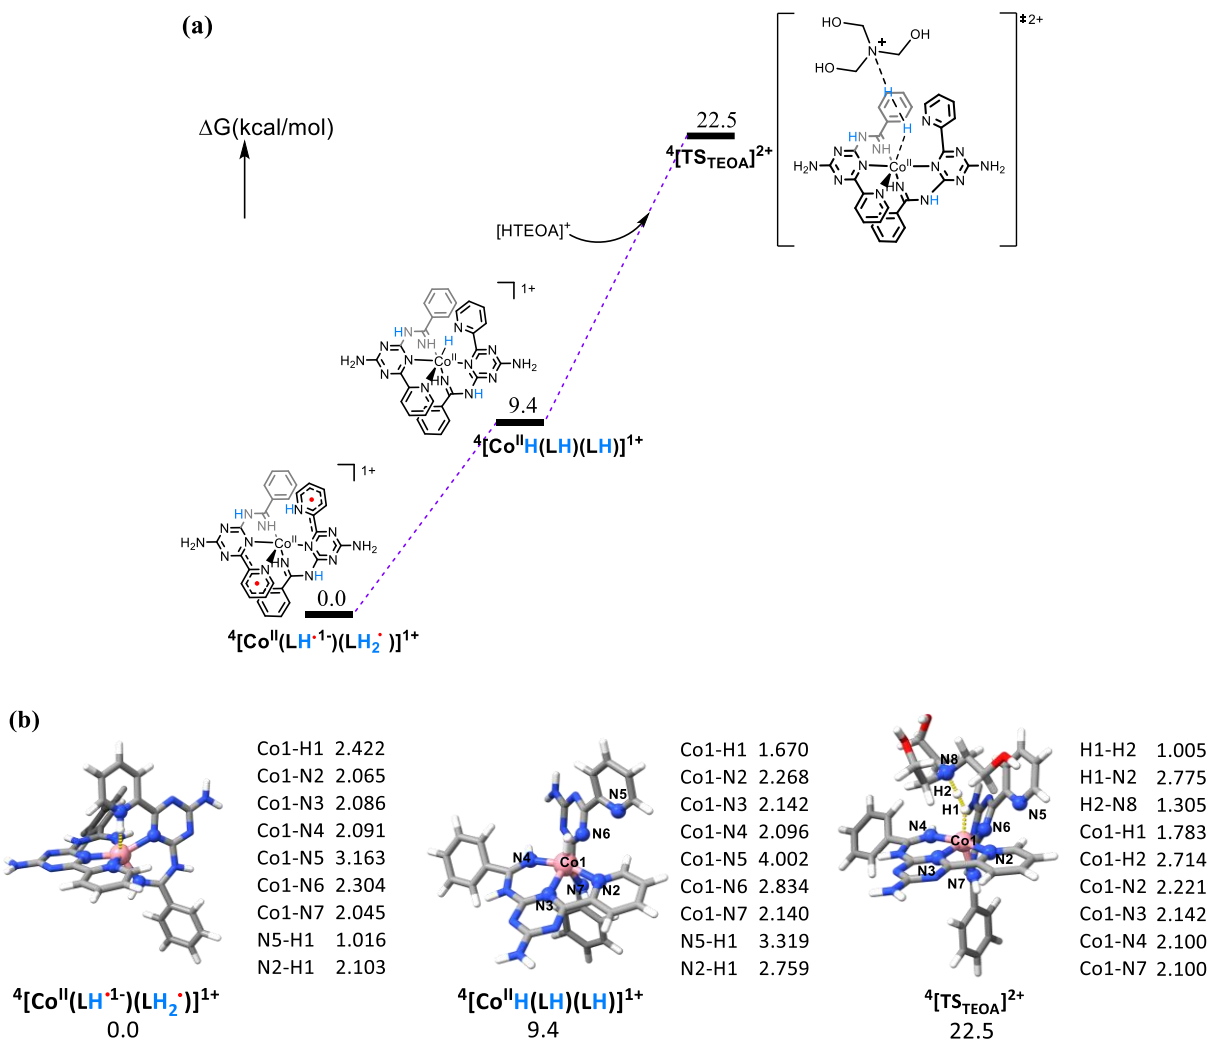

**Fig. S15** (a) The relative free energy (in kcal/mol) for the H<sub>2</sub> elimination from the Co<sup>II</sup>-H<sup>·</sup>HN(TEOA) intermediate. (b) Optimized geometries of  $4[\text{Co}^{\text{II}}(\text{LH}^{\cdot-})(\text{LH}_2^{\cdot+})]^{1+}$ ,  $4[\text{Co}^{\text{II}}\text{H}(\text{LH})(\text{LH})]^{1+}$  and  $4[\text{TS}_{\text{TEOA}}]^{2+}$ .



## References

1. C. J. Cramer, *Essentials of computational chemistry*, John Wiley & Sons, Chichester, England, 2 edn., 2004.
2. M. Namazian, C. Y. Lin and M. L. Coote, *Journal of Chemical Theory and Computation*, 2010, **6**, 2721-2725.
3. S. Trasatti, *Pure and Applied Chemistry*, 1986, **58**, 955-966.
4. V. V. Pavlishchuk and A. W. Addison, *Inorganica Chimica Acta*, 2000, **298**, 97-102.
5. H. Ferreira, M. M. Conradie and J. Conradie, *Data Brief*, 2019, **22**, 436-445.
6. S. Aroua, T. K. Todorova, P. Hommes, L. M. Chamoreau, H. U. Reissig, V. Mougél and M. Fontecave, *Inorg Chem*, 2017, **56**, 5930-5940.
7. W. F. Wacholtz, R. A. Auerbach and R. H. Schmehl, *Inorganic Chemistry*, 1986, **25**, 227-234.
8. S. Rajak, K. Chair, L. K. Rana, P. Kaur, T. Maris and A. Duong, *Inorg Chem*, 2020, **59**, 14910-14919.
9. L. Tong, L. Duan, A. Zhou and R. P. Thummel, *Coordination Chemistry Reviews*, 2020, **402**.
10. N. Queyriaux, R. T. Jane, J. Massin, V. Artero and M. Chavarot-Kerlidou, *Coordination Chemistry Reviews*, 2015, **304-305**, 3-19.
11. A. Rodenberg, M. Oraziotti, B. Probst, C. Bachmann, R. Alberto, K. K. Baldrige and P. Hamm, *Inorganic Chemistry*, 2015, **54**, 646-657.
12. D. M. Arias-Rotondo and J. K. McCusker, *Chemical Society Reviews*, 2016, **45**, 5803-5820.
13. B. Probst, A. Rodenberg, M. Guttentag, P. Hamm and R. Alberto, *Inorganic Chemistry*, 2010, **49**, 6453-6460.
14. M. D. Karkas, O. Verho, E. V. Johnston and B. Akermark, *Chem Rev*, 2014, **114**, 11863-12001.
15. J. N. Harvey, M. Aschi, H. Schwarz and W. Koch, *Theoretical Chemistry Accounts*, 1998, **99**, 95-99.
16. J. Rodríguez-Guerra, *jaimergp/easymecp: v0.3.2 (v0.3.2)*. Zenodo. <https://doi.org/10.5281/zenodo.4293422>, 2020.
17. Z. Marković, J. Tošović, D. Milenković and S. Marković, *Computational and Theoretical Chemistry*, 2016, **1077**, 11-17.
18. P. Surawatanawong, J. W. Tye, M. Y. Darensbourg and M. B. Hall, *Dalton Transactions*, 2010, **39**, 3093-3104.
19. G. J. Tawa, I. A. Topol, S. K. Burt, R. A. Caldwell and A. A. Rashin, *The Journal of Chemical Physics*, 1998, **109**, 4852-4863.
